# Supplementary material for: Chemical Library Screening and Structure-Function Relationship Studies Identify Bisacodyl as a Potent and Selective Cytotoxic Agent Towards Quiescent Human Glioblastoma Tumor Stem-Like Cells
Source: PLoS One. 2015 Aug 13;10(8):e0134793. doi: 10.1371/journal.pone.0134793 (PMC4536076; doi:10.1371/journal.pone.0134793)
Supplement: S4 Table — Molecules were disclosed from the Prestwick Library for their activity on GSCs. (XLSX) [file pone.0134793.s015.xlsx]

## Sheet: zeniou
chemical name	smiles code	structure
Astemizole	c1(n(c2c(n1)cccc2)Cc1ccc(F)cc1)NC1CCN(CC1)CCc1ccc(cc1)OC
Luteolin	c12C(\C=C(/Oc1cc(cc2O)O)\c1cc(c(cc1)O)O)=O
Progesterone	[C@]12([C@]([C@]3([C@@]([C@@]4(\C(=C/C(=O)CC4)\CC3)C)(CC1)[H])[H])(CC[C@@H]2C(=O)C)[H])C
Tamoxifen citrate	C(=C(\c1ccccc1)/CC)(\c1ccc(cc1)OCCN(C)C)/c1ccccc1
Terfenadine	C(C1CCN(CC1)CCCC(c1ccc(C(C)(C)C)cc1)O)(c1ccccc1)(c1ccccc1)O
Ivermectin	[C@@H]1/2[C@]\3([C@](OC/C3=C\C=C\[C@@H]([C@@H](\C(=C\C[C@H]3O[C@]4(O[C@@]([C@H](CC4)C)([C@H](CC)C)[H])C[C@@H](OC1=O)C3)\C)O[C@@H]1O[C@H]([C@@H]([C@H](C1)OC)O[C@@H]1O[C@H]([C@@H]([C@H](C1)OC)O)C)C)C)([C@@H](/C(=C2)/C)O)[H])O
Lynestrenol	[C@]12([C@]([C@]3([C@@]([C@@]4(\C(\CC3)=C/CCC4)[H])(CC1)[H])[H])(CC[C@]2(C#C)O)[H])C
Fendiline hydrochloride	C(c1ccccc1)(c1ccccc1)CCNC(c1ccccc1)C
Perhexiline maleate	C(CC1NCCCC1)(C1CCCCC1)C1CCCCC1
Ethacrynic acid	c1(c(c(c(OCC(=O)O)cc1)Cl)Cl)C(C(=C)CC)=O
Amiodarone hydrochloride	c1(c(oc2c1cccc2)CCCC)C(c1cc(c(c(c1)I)OCCN(CC)CC)I)=O
Bisacodyl	C(c1ccc(OC(=O)C)cc1)(c1ccc(OC(=O)C)cc1)c1ncccc1
Felodipine	C=1(\C(\C(=C(/N/C1/C)\C)\C(=O)OC)c1c(c(Cl)ccc1)Cl)/C(=O)OCC
Parthenolide	[C@@]12(O[C@@]1(CC/C=C(/CC[C@@]1([C@@]2(OC(C1=C)=O)[H])[H])\C)C)[H]
Prenylamine lactate	C(c1ccccc1)(c1ccccc1)CCNC(Cc1ccccc1)C
Suloctidil	[C@H](c1ccc(SC(C)C)cc1)([C@H](NCCCCCCCC)C)O
Beta-Escin	C(OC1[C@@H](C2([C@@H](C[C@]/3(C4(CCC5[C@@](CO)(C(CCC5(C4C/C=C3/C2CC1(C)C)C)OC1O[C@@H]([C@@H](O[C@@H]2O[C@@H]([C@H]([C@@H]([C@H]2O)O)O)CO)[C@@H]([C@H]1O[C@@H]1O[C@@H](C([C@@H]([C@H]1O)O)O)CO)O)C(O)=O)C)C)C)O)CO)OC(C)=O)([H])=C(C)C(O)=O
Sertraline	c12[C@](c3cc(c(cc3)Cl)Cl)(CC[C@@](c1cccc2)(NC)[H])[H]
Zuclopenthixol hydrochloride	C\1(/c2c(Sc3c1cccc3)ccc(c2)Cl)=C/CCN1CCN(CC1)CCO
Ellipticine	Cc1c2ccncc2c(c3c1[nH]c4c3cccc4)C
